# Supplementary material for: Associations of Childcare Arrangements with Adiposity Measures in a Multi-Ethnic Asian Cohort: The GUSTO Study
Source: Int J Environ Res Public Health. 2021 Nov 19;18(22):12178. doi: 10.3390/ijerph182212178 (PMC8622483; doi:10.3390/ijerph182212178)
Supplement: Supplementary file 1 [file ijerph-18-12178-s001.zip › ijerph-1453330-supplementary.pdf]

Table S1. Breakdown of food groups

| Food group                      | List of food items                                                                                                                                          |
|---------------------------------|-------------------------------------------------------------------------------------------------------------------------------------------------------------|
| Fruits                          | Dried fruits, guava, dragonfruit, melon, tropical fruit, stone fruit, grapes and berries, orange, papaya, banana, apple and pears.                          |
| Vegetables                      | Mushroom, gourd, lentils, stalk vegetables, broccoli, pale and dark leafy vegetables, tomato, red and green peppers, corn, peas and beans, carrot, pumpkin. |
| Whole grains                    | Unpolished rice, unpolished rice porridge, oats, wholemeal bread/                                                                                           |
| Deep fried food                 | Dimsum fried, eggs fried, oily fish and non-oily fish deep fried, pork and chicken deep fried, pan fried bread.                                             |
| Fast food                       | Fried potatoes, chicken/fish batter, pizza, burger.                                                                                                         |
| Sugar-sweetened beverages (SSB) | Milo, Horlicks, regular and reduced sugar cultured drinks, sweetened drinks, low calorie drinks, soya milk, traditional drinks.                             |
| Sweet snacks                    | Ice cream, jellies, pudding, sweets, chocolate, fried doughy snacks, biscuits and cookies, puff pastries, butter and cream cakes, sponge and steamed cakes. |

Table S2. Breakdown of primary caregiver identity among childcare centre-going participants (n = 540)

| Childcare type | Primary caregiver identity                                                     | N (%)       | Total N (%) |
|----------------|--------------------------------------------------------------------------------|-------------|-------------|
| FC             | Childcare centre establishment/ childcare centre teachers                      | 272 (100.0) | 272 (50.4)  |
| PCP            | Mother                                                                         | 185 (96.4)  | 192 (35.5)  |
|                | Father                                                                         | 5 (2.6)     |             |
|                | Both parents                                                                   | 2 (1.0)     |             |
| PCN            | Grandparent                                                                    | 39 (51.3)   | 76 (14.1)   |
|                | Domestic helper                                                                | 33 (43.4)   |             |
|                | Others (Aunty)                                                                 | 2 (2.6)     |             |
|                | Both non-parents (grandparent and helper, n=1; childcare and grandparent, n=1) | 2 (2.6)     |             |

FC: Full-time centre-based Childcare; PCP: Partial centre-based Childcare – Parent; PCN: Partial centre-based Childcare – Non-parent.

Table S3. Comparison of demographic characteristics between included and excluded eligible participants (n=1237)

|                                                         | Included (n = 540) | Excluded (n = 697) | P-value |
|---------------------------------------------------------|--------------------|--------------------|---------|
| Child characteristics                                   |                    |                    |         |
| Sex                                                     |                    |                    | 0.893   |
| Male                                                    | 285 (52.8)         | 368 (52.8)         |         |
| Female                                                  | 255 (47.2)         | 329 (47.2)         |         |
| Birth order                                             |                    |                    | 0.090   |
| First child                                             | 233 (43.1)         | 334 (47.9)         |         |
| Second child and above                                  | 307 (56.9)         | 363 (52.1)         |         |
| Age of childcare commencement (months)                  |                    |                    | 0.036   |
| Between 2 and 24 months                                 | 183 (33.9)         | 198 (28.4)         |         |
| Between 25 and 60 months                                | 357 (66.1)         | 499 (71.6)         |         |
| Birth weight (kg)                                       | 3.1 ± 0.4          | 3.0 ± 0.5          | 0.003   |
| Sum of skinfold thicknesses at birth (mm)               | 10.4 ± 2.2         | 10.3 ± 2.4         | 0.488   |
| Maternal characteristics                                |                    |                    |         |
| Age at recruitment (years)                              | 31.1 ± 5.2         | 30.0 ± 5.0         | <0.001  |
| Ethnicity                                               |                    |                    | 0.219   |
| Chinese                                                 | 316 (58.5)         | 375 (53.8)         |         |
| Malay                                                   | 129 (23.9)         | 193 (27.7)         |         |
| Indian                                                  | 95 (17.6)          | 129 (18.5)         |         |
| Highest education level                                 |                    |                    | 0.144   |
| Secondary or lower                                      | 155 (28.7)         | 233 (33.4)         |         |
| Post-Secondary                                          | 192 (35.6)         | 244 (35.0)         |         |
| University or above                                     | 193 (35.7)         | 220 (31.6)         |         |
| Employment                                              |                    |                    | 0.441   |
| Employed                                                | 374 (69.3)         | 497 (71.3)         |         |
| Unemployed                                              | 166 (30.7)         | 200 (28.7)         |         |
| Household income                                        |                    |                    | 0.482   |
| <\$2000                                                 | 81 (15.0)          | 113 (16.2)         |         |
| \$2000-\$5999                                           | 295 (54.6)         | 392 (56.2)         |         |
| >\$6000                                                 | 164 (30.4)         | 192 (27.6)         |         |
| Total physical activity at 6 years postpartum (min/day) |                    |                    | 0.369   |
| 0                                                       | 187 (34.6)         | 258 (37.0)         |         |
| >0-149                                                  | 211 (39.1)         | 273 (39.2)         |         |
| ≥ 150                                                   | 142 (26.3)         | 166 (23.8)         |         |
| TV viewing time at 6 years postpartum (min/day)         |                    |                    | 0.252   |
| <60                                                     | 267 (49.4)         | 333 (47.8)         |         |
| 60-120                                                  | 195 (36.1)         | 243 (34.9)         |         |
| >120                                                    | 78 (14.5)          | 121 (17.3)         |         |
| Weight status at 6 years postpartum (BMI)               |                    |                    | 0.350   |
| Underweight/normal (< 23 kg/m <sup>2</sup> )            | 240 (44.4)         | 295 (42.3)         |         |
| Overweight/obese (≥23 kg/m <sup>2</sup> )               | 300 (55.6)         | 402 (57.7)         |         |

Values are expressed as n (%) or mean ± SD. Results were analysed using Pearson's chi-square test and independent samples t-test.

Table S4. Comparison of demographic characteristics between participant with and without childcare arrangement data (n=1237)

|                                                         | With Data (n = 876) | Without Data (n = 361) | P-value |
|---------------------------------------------------------|---------------------|------------------------|---------|
| Child characteristics                                   |                     |                        |         |
| Sex                                                     |                     |                        | 0.746   |
| Male                                                    | 461 (52.6)          | 191 (52.9)             |         |
| Female                                                  | 415 (47.4)          | 170 (47.1)             |         |
| Birth order                                             |                     |                        | 0.398   |
| First child                                             | 394 (45.0)          | 172 (47.6)             |         |
| Second child and above                                  | 482 (55.0)          | 189 (52.4)             |         |
| Age of childcare commencement (months)                  |                     |                        | <0.001  |
| Between 2 and 24 months                                 | 298 (34.0)          | 85 (23.5)              |         |
| Between 25 and 60 months                                | 578 (66.0)          | 276 (76.5)             |         |
| Birth weight (kg)                                       | 3.1 ± 0.4           | 3.0 ± 0.5              | 0.001   |
| Sum of skinfold thicknesses at birth (mm)               | 10.4 ± 2.2          | 10.1 ± 2.5             | 0.027   |
| Maternal characteristics                                |                     |                        |         |
| Age at recruitment (years)                              | 30.9 ± 5.1          | 29.6 ± 5.1             | <0.001  |
| Ethnicity                                               |                     |                        | 0.283   |
| Chinese                                                 | 499 (56.9)          | 192 (53.2)             |         |
| Malay                                                   | 217 (24.8)          | 105 (29.1)             |         |
| Indian                                                  | 160 (18.3)          | 64 (17.7)              |         |
| Highest education level                                 |                     |                        | 0.013   |
| Secondary or lower                                      | 259 (29.6)          | 128 (35.5)             |         |
| Post-Secondary                                          | 303 (34.6)          | 134 (37.1)             |         |
| University or above                                     | 314 (35.8)          | 99 (27.4)              |         |
| Employment                                              |                     |                        | 0.631   |
| Employed                                                | 620 (70.8)          | 250 (69.3)             |         |
| Unemployed                                              | 256 (29.2)          | 111 (30.7)             |         |
| Household income                                        |                     |                        | 0.228   |
| <\$2000                                                 | 133 (15.2)          | 62 (17.2)              |         |
| \$2000-\$5999                                           | 479 (54.7)          | 207 (57.3)             |         |
| >\$6000                                                 | 264 (30.1)          | 92 (25.5)              |         |
| Total physical activity at 6 years postpartum (min/day) |                     |                        | 0.178   |
| 0                                                       | 311 (35.5)          | 135 (37.4)             |         |
| >0-149                                                  | 348 (39.7)          | 135 (37.4)             |         |
| ≥ 150                                                   | 217 (24.8)          | 91 (25.2)              |         |
| TV viewing time at 6 years postpartum (min/day)         |                     |                        | 0.111   |
| <60                                                     | 429 (49.0)          | 171 (47.4)             |         |
| 60-120                                                  | 311 (35.5)          | 127 (35.2)             |         |
| >120                                                    | 136 (15.5)          | 63 (17.4)              |         |
| Weight status at 6 years postpartum (BMI)               |                     |                        | 0.318   |
| Underweight/normal (< 23 kg/m <sup>2</sup> )            | 381 (43.5)          | 154 (42.7)             |         |
| Overweight/obese (≥23 kg/m <sup>2</sup> )               | 495 (56.5)          | 207 (57.3)             |         |

Values are expressed as n (%) or mean ± SD. Results were analysed using Pearson's chi-square test and independent samples t-test.
